# Supplementary material for: Study of the Interaction of Sorption and Catalytic Centers in Carboxypeptidase T by X-ray Analysis
Source: MDPI journal article supplement (doi:10.3390/cryst11091088), 2021-09-07
Supplement: s1 [file s1]

Archive with 2 entries (2 files):
- crystals-1346094-Suppl..xlsx
- crystals-1346094-Suppl.2.pdf
