# Supplementary material for: Study of the Interaction of Sorption and Catalytic Centers in Carboxypeptidase T by X-ray Analysis
Source: MDPI journal article supplement (doi:10.3390/cryst11091088), 2021-09-07
Supplement: s1 [file s1 › crystals-1346094-Suppl..xlsx]

## Sheet: Лист2
CPT WT	KM, моль/л	KM±	kcat, сек-1	kcat±	kcat/KM,	kcat/KM±	Inh	Ki, моль/л	Ki±
					моль-1×сек-1
ZAAV	4,0×10-5	0,2×10-5	3,3	0,1	8,4×104	0,6×104	SVal	9,2×10-5	0,2×10-5
Distance	between	Substrate	distance	kcat/Km	inhibitor	Ki
O21-Arg129NH1		ZAAE	2.64	3170	Sglu	256.41
		ZAAR	2.78	19500	Sarg	2941.18
		ZAAL	2.68	220000	Sleu	111844
		ZAAF	2.62	200000	Sphe	28571.4
		ZAAV	2.72	84000	sval	10869.6
		ZAAK	2.64	5600	slys	138.889
		ZAAT		2200	sthr	0.00066
		ZAAD		2300	sasp
		ZAAA		200000	sala	12195.1
Distance	between	Substrate	distance	kcat/Km	inhibitor	Ki
O21-ARG129[NH2]		ZAAE	3.21	3170	Sglu	256.41
		ZAAR	3.18	19500	Sarg	2941.18
		ZAAL	3.29	220000	Sleu	111844
		ZAAF	3.28	200000	Sphe	28571.4
		ZAAK	3.13	5600	slys	138.889
		ZAAV	3.15	84000	sval	10869.6
		ZAAT		2200	sthr	1515.15
		ZAAD		2300	sasp
		ZAAA		200000	sala	12195.1
Distance	between	Substrate	distance	kcat/Km	inhibitor	Ki
O15-ASN146[ND2]		ZAAE	2.86	3170	Sglu	256.41
		ZAAR	2.92	19500	Sarg	2941.18
		ZAAL	3.01	220000	Sleu	111844
		ZAAF	3.04	200000	Sphe	28571.4
		ZAAK	2.89	5600	slys	138.889
		ZAAV	2.89	84000	sval	10869.6
		ZAAT		2200	sthr	1515.15
		ZAAD		2300	sasp
		ZAAA		200000	sala	12195.1
Distance		Substrate	distance	kcat/Km	inhibitor	Ki
O15-Arg147NH1		ZAAE	3.47	3170	Sglu	256.41
		ZAAR	3.51	19500	Sarg	2941.18
		ZAAL	3.35	220000	sleu	111844
		ZAAF	3.61	200000	sphe	28571.4
		ZAAK	2.95	5600	slys	138.889
		ZAAV	2.75	84000	sval	10869.6
		ZAAT		2200	sthr	1515.15
		ZAAD		2300	sasp
		ZAAA		200000	sala	12195.1
Distance	between	Substrate	distance	kcat/Km	inhibitor	Ki
O16-Arg147[NH2]		ZAAE	2.92	3170	Sglu	256.41
		ZAAR	2.81	19500	Sarg	2941.18
		ZAAL	2.83	220000	Sleu	111844
		ZAAF	2.76	200000	Sphe	28571.4
		ZAAK	2.78	5600	slys	138.889
		ZAAV	2.78	84000	sval	10869.6
		ZAAT		2200	sthr	1515.15
		ZAAD		2300	sasp
		ZAAA		200000	sala	12195.1
Distance	between	Substrate	distance	kcat/Km	inhibitor	Ki
N19-Thr205[O]		ZAAE	3.31	3170	Sglu	256.41
		ZAAR	3.13	19500	Sarg	2941.18
		ZAAL	2.97	220000	Sleu	111844
		ZAAF	2.96	200000	Sphe	28571.4
		ZAAK	3.14	5600	slys	138.889
		ZAAV	2.99	84000	sval	10869.6
		ZAAT		2200	sthr	1515.15
		ZAAD		2300	sasp
		ZAAA		200000	sala	12195.1
Distance	between	Substrate	distance	kcat/Km	inhibitor	Ki
N17-TYR255[OH]		ZAAE	3.37	3170	Sglu	256.41
		ZAAR	3.14	19500	Sarg	2941.18
		ZAAL	3.09	220000	Sleu	111844
		ZAAF	3.13	200000	Sphe	28571.4
		ZAAK	3.01	5600	slys	138.889
		ZAAV	3.01	84000	sval	10869.6
		ZAAT		2200	sthr	1515.15
		ZAAD		2300	sasp
		ZAAA		200000	sala	12195.1
Distance	between	Substrate	distance	kcat/Km	inhibitor	Ki
S-Zn		ZAAE	3.4	3170	Sglu	256.41
		ZAAR	3.2	19500	Sarg	2941.18
		ZAAL	3.08	220000	Sleu	111844
		ZAAF	3.1	200000	Sphe	28571.4
		ZAAK	3.09	5600	slys	138.889
		ZAAV	3.11	84000	sval	10869.6
		ZAAT		2200	sthr	1515.15
		ZAAD		2300	sasp
		ZAAA		200000	sala	12195.1
										kcat/Km							1/Ki
Distance	between	Substrate	distance	kcat/Km	inhibitor	Ki
O20-Glu277OE2		ZAAE	3.91	3170	Sglu	256.41
		ZAAR	4.09	19500	Sarg	2941.18
		ZAAL	4.34	220000	Sleu	111844
		ZAAF	4.41	200000	Sphe	28571.4
		ZAAK	4.17	5600	slys	138.889
		ZAAV	3.97	84000	sval	10869.6
		ZAAT		2200	sthr	1515.15
		ZAAD		2300	sasp
		ZAAA		200000	sala	12195.1
Distance	between	Substrate	distance	kcat/Km	inhibitor	Ki
O20-Glu277OE1		ZAAE	4.03	3170	Sglu	256.41
		ZAAR	4.08	19500	Sarg	2941.18
		ZAAL	4.46	220000	Sleu	111844
		ZAAF	4.57	200000	Sphe	28571.4
		ZAAK	4.34	5600	slys	138.889
		ZAAV	4.29	84000	sval	10869.6
		ZAAT		2200	sthr	1515.15
		ZAAD		2300	sasp
		ZAAA		200000	sala	12195.1
Distance	between	Substrate	distance	kcat/Km	inhibitor	Ki
N17-GLU277[OE2]		ZAAE	2.52	3170	Sglu	256.41
		ZAAR	2.71	19500	Sarg	2941.18
		ZAAL	2.9	220000	Sleu	111844
		ZAAF	3.1	200000	Sphe	28571.4
		ZAAK	2.76	5600	slys	138.889
		ZAAV	2.77	84000	sval	10869.6
		ZAAT		2200	sthr	1515.15
		ZAAD		2300	sasp
		ZAAA		200000	sala	12195.1
Distance	between	Substrate	distance	kcat/Km	inhibitor	Ki
N19-GLU277[OE1]		ZAAE	3.39	3170	Sglu	256.41
		ZAAR	3.26	19500	Sarg	2941.18
		ZAAL	3.21	220000	Sleu	111844
		ZAAF	3.3	200000	Sphe	28571.4
		ZAAK	3.43	5600	slys	138.889
		ZAAV	3.26	84000	sval	10869.6
		ZAAT		2200	sthr	1515.15
		ZAAD		2300	sasp
		ZAAA		200000	sala	12195.1
Distance	between	Substrate	distance	kcat/Km	inhibitor	Ki
N19-GLU277[OE2]		ZAAE		3170	Sglu	256.41
		ZAAR		19500	Sarg	2941.18
		ZAAL		220000	Sleu	111844
		ZAAF		200000	Sphe	28571.4
		ZAAA		200000	sala	12195.1
		ZAAV	3.66	84000	sval	10869.6
		ZAAT		2200	sthr	1515.15
		ZAAD		2300	sasp
		ZAAK	3.32	5600	slys	138.889
Distance	between	Substrate	distance	kcat/Km	inhibitor	Ki
O16-TYR255[OH]		ZAAE	2.76	3170	Sglu	256.41
		ZAAR	2.71	19500	Sarg	2941.18
		ZAAL	2.64	220000	Sleu	111844
		ZAAF	2.66	200000	Sphe	28571.4
		ZAAK	2.66	5600	slys	138.889
		ZAAV	2.62	84000	sval	10869.6
		ZAAT		2200	sthr	1515.15
		ZAAD		2300	sasp
		ZAAA		200000	sala	12195.1
Distance	between	Substrate	distance	kcat/Km	inhibitor	Ki
O21-Zn		ZAAE	3.21	3170	Sglu	256.41
		ZAAR	3.31	19500	Sarg	2941.18
		ZAAL	3.02	220000	Sleu	111844
		ZAAF	3.1	200000	Sphe	28571.4
		ZAAK	3.24	5600	slys	138.889
		ZAAV	3.18	84000	sval	10869.6
		ZAAT		2200	sthr	1515.15
		ZAAD		2300	sasp
		ZAAA		200000	sala	12195.1
Distance	between	Substrate	distance	kcat/Km	inhibitor	Ki
O20-Zn		ZAAE	4.2	3170	Sglu	256.41
		ZAAR	4.28	19500	Sarg	2941.18
		ZAAL	4.04	220000	Sleu	111844
		ZAAF	4.1	200000	Sphe	28571.4
		ZAAK	4.1	5600	slys	138.889
		ZAAV	4.23	84000	sval	10869.6
		ZAAT		2200	sthr	1515.15
		ZAAD		2300	sasp
		ZAAA		200000	sala	12195.1

## Sheet: Лист1
CPT WT	KM, моль/л	KM±	kcat, сек-1	kcat±	kcat/KM,	kcat/KM±	Inh	Ki, моль/л	Ki±
					моль-1×сек-1
ZAAV	4,0×10-5	0,2×10-5	3,3	0,1	8,4×104	0,6×104	SVal	9,2×10-5	0,2×10-5
Distance	between	Substrate	distance	kcat/Km	inhibitor	Ki
O21-Arg129NH1		ZAAE	2.64	3170	Sglu	256.41
x		ZAAR	2.78	19500	Sarg	2941.18
		ZAAL	2.68	220000	Sleu	111844
		ZAAF	2.62	200000	Sphe	28571.4
		ZAAV	2.72	84000	sval	10869.6
Distance	between	Substrate	distance	kcat/Km	inhibitor	Ki
O21-ARG129[NH2]		ZAAE	3.21	3170	Sglu	256.41
x		ZAAR	3.18	19500	Sarg	2941.18
		ZAAL	3.29	220000	Sleu	111844
		ZAAF	3.28	200000	Sphe	28571.4
		ZAAV	3.15	84000	sval	10869.6
Distance	between	Substrate	distance	kcat/Km	inhibitor	Ki
O15-ASN146[ND2]		ZAAE	2.86	3170	Sglu	256.41
x		ZAAR	2.92	19500	Sarg	2941.18
		ZAAL	3.01	220000	Sleu	111844
		ZAAF	3.04	200000	Sphe	28571.4
		ZAAV	2.89	84000	sval	10869.6
Distance		Substrate	distance	kcat/Km	inhibitor	Ki
O15-Arg147NH1		ZAAE	3.47	3170	Sglu	256.41
x		ZAAR	3.51	19500	Sarg	2941.18
		ZAAL	3.35	220000	sleu	111844
		ZAAF	3.61	200000	sphe	28571.4
		ZAAV	2.75	84000	sval	10869.6
Distance	between	Substrate	distance	kcat/Km	inhibitor	Ki
O16-Arg147[NH2]		ZAAE	2.92	3170	Sglu	256.41
x		ZAAR	2.81	19500	Sarg	2941.18
		ZAAL	2.83	220000	Sleu	111844
		ZAAF	2.76	200000	Sphe	28571.4
		ZAAV	2.78	84000	sval	10869.6
Distance	between	Substrate	distance	kcat/Km	inhibitor	Ki
N19-Thr205[O]		ZAAE	3.31	3170	Sglu	256.41
v		ZAAR	3.13	19500	Sarg	2941.18
		ZAAL	2.97	220000	Sleu	111844
		ZAAF	2.96	200000	Sphe	28571.4
		ZAAV	2.99	84000	sval	10869.6
Distance	between	Substrate	distance	kcat/Km	inhibitor	Ki
N17-TYR255[OH]		ZAAE	3.37	3170	Sglu	256.41
x		ZAAR	3.14	19500	Sarg	2941.18
		ZAAL	3.09	220000	Sleu	111844
		ZAAF	3.13	200000	Sphe	28571.4
		ZAAV	3.01	84000	sval	10869.6
Distance	between	Substrate	distance	kcat/Km	inhibitor	Ki
S-Zn		ZAAE	3.4	3170	Sglu	256.41
v		ZAAR	3.2	19500	Sarg	2941.18
		ZAAL	3.08	220000	Sleu	111844
		ZAAF	3.1	200000	Sphe	28571.4
		ZAAV	3.11	84000	sval	10869.6
										kcat/Km							1/Ki
Distance	between	Substrate	distance	kcat/Km	inhibitor	Ki
O20-Glu277OE2		ZAAE	3.91	3170	Sglu	256.41
x		ZAAR	4.09	19500	Sarg	2941.18
		ZAAL	4.34	220000	Sleu	111844
		ZAAF	4.41	200000	Sphe	28571.4
		ZAAV	3.97	84000	sval	10869.6
Distance	between	Substrate	distance	kcat/Km	inhibitor	Ki
O20-Glu277OE1		ZAAE	4.03	3170	Sglu	256.41
v		ZAAR	4.08	19500	Sarg	2941.18
		ZAAL	4.46	220000	Sleu	111844
		ZAAF	4.57	200000	Sphe	28571.4
		ZAAV	4.29	84000	sval	10869.6
Distance	between	Substrate	distance	kcat/Km	inhibitor	Ki
N17-GLU277[OE2]		ZAAE	2.52	3170	Sglu	256.41
v		ZAAR	2.71	19500	Sarg	2941.18
		ZAAL	2.9	220000	Sleu	111844
		ZAAF	3.1	200000	Sphe	28571.4
		ZAAV	2.77	84000	sval	10869.6
Distance	between	Substrate	distance	kcat/Km	inhibitor	Ki
N19-GLU277[OE1]		ZAAE	3.39	3170	Sglu	256.41
x		ZAAR	3.26	19500	Sarg	2941.18
		ZAAL	3.21	220000	Sleu	111844
		ZAAF	3.3	200000	Sphe	28571.4
		ZAAV	3.26	84000	sval	10869.6
Distance	between	Substrate	distance	kcat/Km	inhibitor	Ki
N19-GLU277[OE2]		ZAAE		3170	Sglu	256.41
		ZAAR		19500	Sarg	2941.18
		ZAAL		220000	Sleu	111844
		ZAAF		200000	Sphe	28571.4
		ZAAV	3.66	84000	sval	10869.6
Distance	between	Substrate	distance	kcat/Km	inhibitor	Ki
O16-TYR255[OH]		ZAAE	2.76	3170	Sglu	256.41
v		ZAAR	2.71	19500	Sarg	2941.18
		ZAAL	2.64	220000	Sleu	111844
		ZAAF	2.66	200000	Sphe	28571.4
		ZAAV	2.62	84000	sval	10869.6
Distance	between	Substrate	distance	kcat/Km	inhibitor	Ki
O21-Zn		ZAAE	3.21	3170	Sglu	256.41
v		ZAAR	3.31	19500	Sarg	2941.18
		ZAAL	3.02	220000	Sleu	111844
		ZAAF	3.1	200000	Sphe	28571.4
		ZAAV	3.18	84000	sval	10869.6
Distance	between	Substrate	distance	kcat/Km	inhibitor	Ki
O20-Zn		ZAAE	4.2	3170	Sglu	256.41
v		ZAAR	4.28	19500	Sarg	2941.18
		ZAAL	4.04	220000	Sleu	111844
		ZAAF	4.1	200000	Sphe	28571.4
		ZAAV	4.23	84000	sval	10869.6
