# Supplementary material for: Study of the Interaction of Sorption and Catalytic Centers in Carboxypeptidase T by X-ray Analysis
Source: MDPI journal article supplement (doi:10.3390/cryst11091088), 2021-09-07
Supplement: s1 [file s1 › crystals-1346094-Suppl.2.pdf]

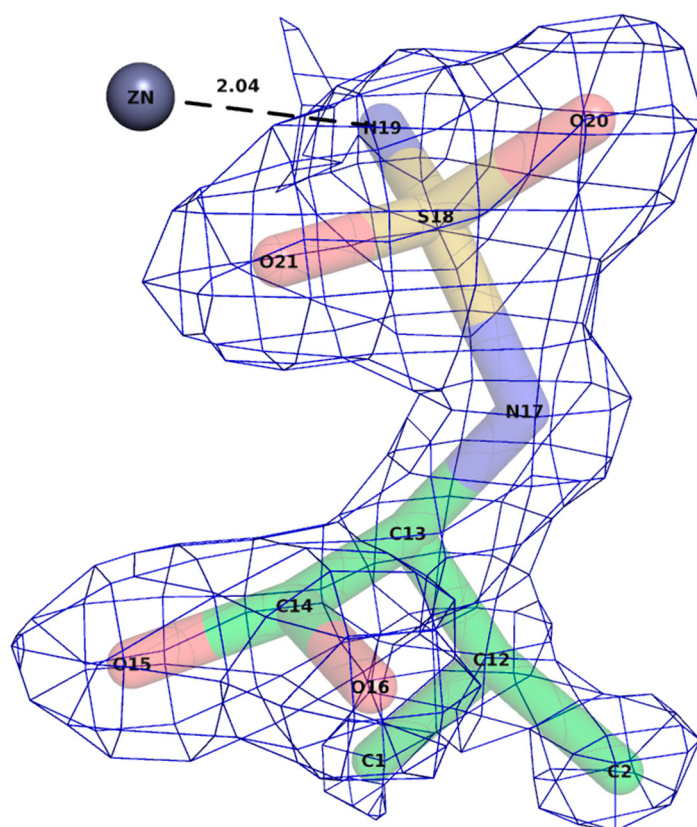

**Figure S1.** Electron density for SVal. The ligand omitted Fo-Fc map is contoured at 2 r.m.s.d. The atoms colors are carbon (green), nitrogen (blue), oxygen (red), sulfur (yellow). Atom numbering for SVal is shown.
